# Supplementary material for: A Genetics-First Approach to Dissecting the Heterogeneity of Autism: Phenotypic Comparison of Autism Risk Copy Number Variants
Source: Atypon-hosted journal article supplement (doi:10.1176/appi.ajp.2020.20010015), 2021-01-01
Supplement: appi.ajp.2020.20010015.ds001.pdf [file appi.ajp.2020.20010015.ds001.pdf]

## Supplementary Materials

### IMAGINE-ID Consortium Membership

<sup>1</sup> School of Clinical Medicine, University of Cambridge, Cambridge Biomedical Campus, Cambridge, UK

<sup>2</sup> Medical Research Council Centre for Neuropsychiatric Genetics and Genomics, Division of Psychological Medicine and Clinical Neurosciences, and Neuroscience and Mental Health Research Institute, Cardiff University, Cardiff, UK.

<sup>3</sup> NIHR BRC Great Ormond Street Institute of Child Health, University College London, London, UK

<sup>4</sup> Unique – The Rare Chromosome Disorder Support Group, London, UK.

| Title (if applicable) | First Name | Surname      | Institution |
|-----------------------|------------|--------------|-------------|
| Dr                    | Kate       | Baker        | 1           |
|                       | Eleanor    | Dewhurst     | 1           |
|                       | Amy        | Lafont       | 1           |
| Professor             | F Lucy     | Raymond      | 1           |
|                       | Terry      | Shirley      | 1           |
|                       | Hayley     | Tilley       | 1           |
|                       | Husne      | Timur        | 1           |
|                       | Catherine  | Titterton    | 1           |
|                       | Neil       | Walker       | 1           |
|                       | Sarah      | Wallwork     | 1           |
|                       | Francesca  | Wicks        | 1           |
| Dr                    | Zheng      | Ye           | 1           |
|                       | Marie      | Erwood       | 1           |
|                       | Sophie     | Andrews      | 2           |
|                       | Philippa   | Birch        | 2           |
|                       | Samantha   | Bowen        | 2           |
|                       | Karen      | Bradley      | 2           |
|                       | Aimee      | Challenger   | 2           |
| Dr                    | Samuel     | Chawner      | 2           |
| Dr                    | Andrew     | Cuthbert     | 2           |
| Professor             | Jeremy     | Hall         | 2           |
| Professor             | Peter      | Holmans      | 2           |
|                       | Sarah      | Law          | 2           |
|                       | Nicola     | Lewis        | 2           |
|                       | Sinead     | Morrison     | 2           |
|                       | Hayley     | Moss         | 2           |
| Professor Sir         | Michael    | Owen         | 2           |
|                       | Sinead     | Ray          | 2           |
|                       | Matthew    | Sopp         | 2           |
|                       | Molly      | Tong         | 2           |
| Professor             | Marianne   | van den Bree | 2           |
|                       | Nadia      | Coscini      | 3           |

|           |            |              |   |
|-----------|------------|--------------|---|
|           | Sarah      | Davies       | 3 |
|           | Spiros     | Denaxas      | 3 |
|           | Hayley     | Denyer       | 3 |
|           | Nasrtullah | Fatih        | 3 |
|           | Manoj      | Juj          | 3 |
|           | Ellie      | Kerry        | 3 |
|           | Anna       | Lucock       | 3 |
| Dr        | William    | Mandy        | 3 |
|           | Frida      | Printzlau    | 3 |
| Professor | David      | Skuse        | 3 |
| Dr        | Ramya      | Srinivasan   | 3 |
| Dr        | Susan      | Walker       | 3 |
|           | Alice      | Watkins      | 3 |
| Dr        | Jeanne     | Wolstencroft | 3 |
| Dr        | Beverly    | Searle       | 4 |
| Dr        | Anna       | Pelling      | 4 |

#### IMAGINE-ID Clinical Collaborators

| <b>Title (if applicable)</b> | <b>First Name</b> | <b>Surname</b> | <b>Shorthand Institution</b> | <b>Genetics service</b>                    | <b>Hospital Trust</b>                               |
|------------------------------|-------------------|----------------|------------------------------|--------------------------------------------|-----------------------------------------------------|
| Dr                           | John              | Dean           | Aberdeen                     | Aberdeen Royal Infirmary Genetics Service  | NHS GRAMPIAN                                        |
| Dr                           | Lisa              | Robertson      | Aberdeen                     | Aberdeen Royal Infirmary Genetics Service  | NHS GRAMPIAN                                        |
| Dr                           | Denise            | Williams       | Birmingham                   | West Midlands Regional Genetics Service    | BIRMINGHAM WOMEN'S NHS FOUNDATION TRUST             |
| Dr                           | Alan              | Donaldson      | Bristol                      | Bristol Clinical Genetics Service          | UNIVERSITY HOSPITALS BRISTOL NHS FOUNDATION TRUST   |
| Professor                    | Lucy              | Raymond        | Cambridge                    | East Anglian Medical Genetics Service      | CAMBRIDGE UNIVERSITY HOSPITALS NHS FOUNDATION TRUST |
| Dr                           | Annie             | Procter        | Cardiff                      | All Wales Regional Genetics Service        | CARDIFF AND VALE UNIVERSITY LHB                     |
| Dr                           | Jonathan          | Berg           | Dundee                       | Ninewells Hospital Dundee Genetics Service | NHS TAYSIDE                                         |

|           |         |           |           |                                                                                    |                                                                                  |
|-----------|---------|-----------|-----------|------------------------------------------------------------------------------------|----------------------------------------------------------------------------------|
|           | Yanick  | Crow      | Edinburgh | Western General Hospital<br>Edinburgh<br>Genetics Service                          | NHS Lothian                                                                      |
| Professor | Anne    | Lampe     | Edinburgh | Western General Hospital<br>Edinburgh<br>Genetics Service                          | NHS Lothian                                                                      |
| Dr        | Julia   | Rankin    | Exeter    | Peninsula<br>Genetics Service                                                      | ROYAL DEVON<br>AND EXETER<br>NHS<br>FOUNDATION<br>TRUST                          |
| Dr        | Shelagh | Joss      | Glasgow   | Glasgow Genetics<br>Centre                                                         | NHS Greater<br>Glasgow &<br>Clyde                                                |
| Professor | Lyn     | Chitty    | GOSH      | London North<br>East Thames<br>Regional Genetics<br>Service - Clinical<br>Genetics | GREAT<br>ORMOND<br>STREET<br>HOSPITAL FOR<br>CHILDREN NHS<br>FOUNDATION<br>TRUST |
| Professor | Frances | Flinter   | Guy's     | London Guy's<br>Hospital Genetic<br>Centre                                         | GUY'S AND ST<br>THOMAS' NHS<br>FOUNDATION<br>TRUST                               |
| Dr        | Muriel  | Holder    | Guy's     | London Guy's<br>Hospital Genetic<br>Centre                                         | GUY'S AND ST<br>THOMAS' NHS<br>FOUNDATION<br>TRUST                               |
| Dr        | Alison  | Kraus     | Leeds     | Yorkshire<br>Regional Genetics<br>Service - Clinical<br>Genetics                   | LEEDS<br>TEACHING<br>HOSPITALS NHS<br>TRUST                                      |
| Dr        | Julian  | Barwell   | Leicester | Leicestershire<br>Genetics Centre                                                  | UNIVERSITY<br>HOSPITALS OF<br>LEICESTER NHS<br>TRUST                             |
| Dr        | Pradeep | Vasudevan | Leicester | Leicestershire<br>Genetics Centre                                                  | UNIVERSITY<br>HOSPITALS OF<br>LEICESTER NHS<br>TRUST                             |
| Dr        | Astrid  | Weber     | Liverpool | Cheshire &<br>Merseyside<br>Regional Genetic<br>Service                            | LIVERPOOL<br>WOMEN'S NHS<br>FOUNDATION<br>TRUST                                  |

|    |          |          |                   |                                                    |                                                              |
|----|----------|----------|-------------------|----------------------------------------------------|--------------------------------------------------------------|
| Dr | William  | Newman   | Manchester        | Manchester Centre for Genomic Medicine             | CENTRAL MANCHESTER UNIVERSITY HOSPITALS NHS FOUNDATION TRUST |
| Dr | Miranda  | Splitt   | Newcastle         | Northern Genetics Service                          | THE NEWCASTLE UPON TYNE HOSPITALS NHS FOUNDATION TRUST       |
| Dr | Virginia | Clowes   | North West Thames | London North West Thames Regional Genetics Service | NORTH WEST LONDON HOSPITALS NHS TRUST                        |
| Dr | Fleur    | van Dijk | North West Thames | London North West Thames Regional Genetics Service | NORTH WEST LONDON HOSPITALS NHS TRUST                        |
| Dr | Rachel   | Harrison | Nottingham        | Nottingham Regional Genetics Service               | NOTTINGHAM UNIVERSITY HOSPITALS NHS TRUST                    |
| Dr | Usha     | Kini     | Oxford            | Oxford Genetics Service                            | OXFORD UNIVERSITY HOSPITALS NHS TRUST                        |
| Dr | Oliver   | Quarrell | Sheffield         | Sheffield Genetic Services                         | SHEFFIELD CHILDREN'S NHS FOUNDATION TRUST                    |
| Dr | Diana    | Baralle  | Southampton       | Wessex Clinical Genetics Service                   | UNIVERSITY HOSPITAL SOUTHAMPTON NHS FOUNDATION TRUST         |
| Dr | Sahar    | Mansour  | St George's       | London South West Thames Regional Genetics Service | ST GEORGE'S HEALTHCARE NHS FOUNDATION TRUST                  |

**Supplementary Table S1:** Number of participants at each site

| Research Centre                              | Number of individuals contributed |                     |                  |                     |
|----------------------------------------------|-----------------------------------|---------------------|------------------|---------------------|
|                                              | 16p11.2 deletion                  | 16p11.2 duplication | 22q11.2 deletion | 22q11.2 duplication |
| Cardiff University ECHO & IMAGINE-ID cohorts | 8                                 | 8                   | 67               | 11                  |
| Belgrade University Children's Hospital      |                                   |                     | 8                |                     |
| Children's Hospital of Philadelphia          |                                   |                     |                  | 18                  |
| 16p11.2 European consortium                  | 4                                 | 9                   |                  |                     |
| Simons VIP                                   | 70                                | 33                  |                  |                     |
| University of California, Los Angeles        |                                   |                     | 69               | 16                  |
| University Medical Center Utrecht            |                                   |                     | 140              |                     |
| The State University of New York             |                                   |                     | 86               |                     |

**Supplementary Table S2:** Genotype information

| CNV group           | Genotype                     | Frequency |
|---------------------|------------------------------|-----------|
| 16p11.2 deletion    | BP2-BP5                      | 2         |
| 16p11.2 deletion    | BP4-BP5                      | 80        |
| 16p11.2 duplication | BP4-BP5                      | 50        |
| 22q11.2 deletion    | LCR A-B                      | 23        |
| 22q11.2 deletion    | LCR A-B + centromeric region | 1         |
| 22q11.2 deletion    | LCR A-C                      | 2         |
| 22q11.2 deletion    | LCR A-D                      | 261       |
| 22q11.2 deletion    | confirmed via FISH*          | 83        |
| 22q11.2 duplication | LCR A-B                      | 6         |
| 22q11.2 duplication | LCR A-D                      | 38        |
| 22q11.2 duplication | LCR A-F                      | 1         |

BP, breakpoints; LCR, low copy repeat region; FISH, Fluorescence in situ hybridization.

\*22q11.2 deletion confirmed by FISH, indicating deletion hits the critical region but exact LCRs could not be defined.

**Supplementary Table S3:** ADI-R assessors and sites of assessment

| Site                                                          | Assessors                                                                                                                                                                                                                                                                                                                     | Sites of assessments                                                                                                                                                                                                                  |
|---------------------------------------------------------------|-------------------------------------------------------------------------------------------------------------------------------------------------------------------------------------------------------------------------------------------------------------------------------------------------------------------------------|---------------------------------------------------------------------------------------------------------------------------------------------------------------------------------------------------------------------------------------|
| Cardiff University                                            | Dr Samuel Chawner (postdoctoral research psychologist), Hayley Moss (psychology research assistant), Dr Joanne Doherty (Child and Adolescent Mental Health Services psychiatrist). Training and reliability by certified ADI-R trainer Dr Sarah Curran (Consultant Child and Adolescent Mental Health Services Psychiatrist). | Assessments administered in the patient's home, or at the Hadyn Ellis Building clinic at Cardiff University.                                                                                                                          |
| Belgrade University Children's Hospital                       | Milica Pejovic-Milovancevic (Child psychiatrist, Institute of Mental Health, Belgrade)<br>Marina Mihaljevic (Psychiatrist, Clinic for Psychiatry, Clinical Center of Serbia). Assessors were trained by ADI-R trainer Prof Patrick Bolton Consultant Child and Adolescent Mental Health Services Psychiatrist                 | Assessments administered at the Institute of Mental Health, Belgrade.                                                                                                                                                                 |
| Children's Hospital of Philadelphia                           | Research-reliable, Licensed Ph.D. or supervised M.A. clinical psychologists.                                                                                                                                                                                                                                                  | Assessments administered remotely from Children's Hospital of Philadelphia                                                                                                                                                            |
| 16p11.2 European consortium                                   | Trained and certified psychologists. ADI-R training provided by Professor Bernadette Rogé.                                                                                                                                                                                                                                    | Assessments administered at Lausanne University hospital                                                                                                                                                                              |
| Simons VIP                                                    | Research-reliable, Licensed Ph.D. or supervised M.A. clinical psychologists. Training and reliability were conducted by Catherine Lord's lab (UMACC/CADB) and/or independent certified ADI-R trainers.                                                                                                                        | Assessments administered at one of five Simons VIP sites (Baylor College of Medicine, Boston Children's Hospital, Children's Hospital of Philadelphia, the University of California San Francisco, and the University of Washington). |
| University of California, Los Angeles                         | Clinical psychologists and psychometrists trained in the ADI-R to research reliability levels by the UCLA Center for Autism Research and Treatment (CART).                                                                                                                                                                    | Assessments administered at University of California Los Angeles, Semel Institute for Neuroscience and Human Behavior.                                                                                                                |
| University Medical Center Utrecht                             | M.D. PhD child/adolescent psychiatrist and M.Sc. psychologist, who were certified in ADI-R assessments. Training and reliability were conducted by an independent, certified ADI-R trainer.                                                                                                                                   | Assessments administered took place at the psychiatry department of the University Medical Center Utrecht.                                                                                                                            |
| The State University of New York - Upstate Medical University | Research-reliable, licensed Ph.D. clinical child psychologist and M.D. child/adolescent psychiatrist.                                                                                                                                                                                                                         | Assessments administered at State University of New York, Upstate Department of Psychiatry.                                                                                                                                           |

## **ADI-R**

Following previous studies<sup>1-3</sup> we only analysed the scores that contributed to the diagnostic algorithm, the majority of which are early developmental “ever/most abnormal” items<sup>1</sup>. The social domain comprises four domains: ‘social interaction’, ‘peer relationships’, ‘shared enjoyment’ and ‘socioemotional reciprocity’ subdomains. For the communication domain we excluded subdomains that were designed only for verbal individuals and only retained those available for both verbal and nonverbal individuals, which were ‘gesture’ and ‘imitation and imagination’ subdomains. This followed the approach of a previous study that examined subdomain scores<sup>3</sup>. The RRB (Restricted, Repetitive, and Stereotyped Behaviours) domain comprises ‘repetitive behaviour’, ‘routines and rituals’, ‘motor mannerisms’ (hand and finger mannerisms, and stereotyped body movements) and ‘sensorimotor interest’ (unusual sensory interests and repetitive use of objects) subdomains. All ADI-R assessors were extensively trained to research reliability standards and each site used consensus coding procedures.

### **Analysis of covariance models**

*Autism symptom severity:* Analysis of covariance (ANCOVA) model with ADI-R total score as the phenotypic outcome. *Autism domain profile:* multivariate analysis of covariance (MANCOVA) with social, communication and repetitive behaviour ADI-R domain total scores as the phenotypic outcomes entered into the same model. *Autism subdomain profile:* MANCOVA model with ADI-R social subdomains (social interaction, peer relationships, shared enjoyment and socioemotional reciprocity), ADI-R communication subdomains (gestures, imagination and imitation), ADI-R repetitive behaviour subdomains (unusual interests, routines and rituals, motor mannerisms and sensorimotor mannerisms) as phenotypic outcomes entered into the same model. *Cognitive profile:* ANCOVA model with FSIQ as the phenotypic outcome, and a further MANCOVA model with PIQ and VIQ as phenotypic outcomes entered into the same model.



**Supplementary Table S4:** Proportion of CNV carriers who met clinical cut-offs for the three autism domains

|                     | Social | Communication | RRB |
|---------------------|--------|---------------|-----|
| 16p11.2 deletion    | 60%    | 73%           | 59% |
| 16p11.2 duplication | 72%    | 74%           | 86% |
| 22q11.2 deletion    | 47%    | 46%           | 32% |
| 22q11.2 duplication | 53%    | 64%           | 58% |

RRB: Restricted, Repetitive, and Stereotyped Behaviours

**Supplementary Table S5:** Between group variance adjusted for FSIQ

FSIQ, Full Scale Intelligence Quotient; VIQ, Verbal Intelligence Quotient; PIQ, Performance Intelligence Quotient ; ADI-R, Autism Diagnostic Interview ; RRB, Restricted, Repetitive, and Stereotyped Behaviours.

| Score                       | Between group variation controlled for FSIQ |               |
|-----------------------------|---------------------------------------------|---------------|
|                             | p-value                                     | eta-squared % |
| <b>ADI-R scores</b>         |                                             |               |
| <b>Total score</b>          | <0.001                                      | 8.1           |
| <b>Social domain</b>        | <0.001                                      | 6.0           |
| <i>subdomains:</i>          |                                             |               |
| Social interaction          | 0.044                                       | 1.6           |
| Peer relationships          | <0.001                                      | 3.3           |
| Shared enjoyment            | <0.001                                      | 5.7           |
| Socioemotional reciprocity  | <0.001                                      | 8.5           |
| <b>Communication domain</b> | <0.001                                      | 3.2           |
| <i>subdomains:</i>          |                                             |               |
| Gestures                    | <0.001                                      | 3.5           |
| Imagination & Imitation     | 0.011                                       | 2.0           |
| <b>RRB domain</b>           | <0.001                                      | 16.4          |
| <i>subdomains</i>           |                                             |               |
| Unusual interests           | <0.001                                      | 4.9           |
| Routines & rituals          | <0.001                                      | 3.5           |
| Motor mannerisms            | <0.001                                      | 23.4          |
| Sensorimotor interests      | <0.001                                      | 19.9          |

**Supplementary Table S6:** Effect of age in Aim 1 MANCOVA analyses

FSIQ, Full Scale Intelligence Quotient; VIQ, Verbal Intelligence Quotient; PIQ, Performance Intelligence Quotient ; ADI-R, Autism Diagnostic Interview ; RRB, Restricted, Repetitive, and Stereotyped Behaviours.

| Score                                             | p-value | Eta-squared | Fixed effect slope coefficient |
|---------------------------------------------------|---------|-------------|--------------------------------|
| <b>Cognitive scores</b>                           |         |             |                                |
| FSIQ                                              | 0.009   | 1.2         | -0.37                          |
| VIQ                                               | 0.088   | 0.6         | -0.27                          |
| PIQ                                               | <0.001  | 1.9         | -0.54                          |
| <b>ADI-R scores</b>                               |         |             |                                |
| <b>Total score</b>                                | 0.232   | 0.2         | -0.18                          |
| <b>Social domain</b><br><i>subdomains:</i>        | 0.233   | 0.2         | -0.11                          |
| Social interaction                                | 0.921   | 0.0         | -0.01                          |
| Peer relationships                                | 0.106   | 0.5         | -0.05                          |
| Shared enjoyment                                  | 0.570   | 0.1         | 0.01                           |
| Socioemotional reciprocity                        | 0.014   | 1.0         | -0.07                          |
| <b>Communication domain</b><br><i>subdomains:</i> | 0.766   | 0.0         | -0.02                          |
| Gestures                                          | 0.215   | 0.3         | -0.03                          |
| Imagination & Imitation                           | 0.348   | 0.2         | 0.01                           |
| <b>RRB domain</b><br><i>subdomains:</i>           | 0.055   | 0.6         | -0.05                          |
| Unusual interests                                 | 0.315   | 0.2         | 0.01                           |
| Routines & rituals                                | 0.197   | 0.3         | -0.01                          |
| Motor mannerisms                                  | 0.132   | 0.3         | -0.01                          |
| Sensorimotor interests                            | <0.001  | 2.9         | -0.03                          |

### Supplementary Table S7: Phenotypic post hoc contrasts between genetic variant groups

Arrows indicate the direction of effect of the difference between genetic variant groups; an upward arrow ↑ indicates that the first group mentioned in the pair has a higher value than the second group mentioned; a downward arrow ↓ indicates the opposite; no arrow indicates that the values were the same between groups. For example, for FSIQ, 16p11.2 duplication carriers have a lower FSIQ than 16p11.2 deletion carriers. Tukey’s method was used to conduct post hoc contrasts between CNV groups, producing p-values adjusted for the number of contrasts. Green highlighted cells indicate a significant contrast.

| Phenotypic trait           | 16p11.2 duplication-16p11.2 deletion |          | 22q11.2 deletion-16p11.2 deletion |          | 22q11.2 duplication-16p11.2 deletion |          | 22q11.2 deletion-16p11.2 duplication |          | 22q11.2 duplication-16p11.2 duplication |          | 22q11.2 duplication-22q11.2 deletion |          |
|----------------------------|--------------------------------------|----------|-----------------------------------|----------|--------------------------------------|----------|--------------------------------------|----------|-----------------------------------------|----------|--------------------------------------|----------|
|                            | ↑                                    | ↓        | ↑                                 | ↓        | ↑                                    | ↓        | ↑                                    | ↓        | ↑                                       | ↓        | ↑                                    | ↓        |
| FSIQ                       | 6.71E-04                             | 3.10E-08 | 1.33E-01                          | 9.94E-01 | 2.93E-06                             | 1.69E-09 | 2.93E-06                             | 9.94E-01 | 2.93E-06                                | 1.69E-09 | 2.93E-06                             | 1.69E-09 |
| VIQ                        | 3.90E-01                             | 3.80E-02 | 2.78E-01                          | 9.90E-01 | 1.96E-02                             | 8.37E-04 | 1.96E-02                             | 9.90E-01 | 1.96E-02                                | 8.37E-04 | 1.96E-02                             | 8.37E-04 |
| PIQ                        | 7.80E-06                             | 1.90E-10 | 9.78E-01                          | 9.98E-01 | 1.42E-04                             | 3.47E-06 | 1.42E-04                             | 9.98E-01 | 1.42E-04                                | 3.47E-06 | 1.42E-04                             | 3.47E-06 |
| Total ADI-R score          | 4.94E-02                             | 2.18E-03 | 9.80E-01                          | 2.65E-08 | 4.62E-02                             | 9.88E-02 | 4.62E-02                             | 2.65E-08 | 4.62E-02                                | 9.88E-02 | 4.62E-02                             | 9.88E-02 |
| Social domain              | 1.39E-01                             | 1.25E-02 | 9.86E-01                          | 3.88E-06 | 1.29E-01                             | 2.03E-01 | 1.29E-01                             | 3.88E-06 | 1.29E-01                                | 2.03E-01 | 1.29E-01                             | 2.03E-01 |
| Social interaction         | 4.15E-01                             | 9.24E-01 | 9.90E-01                          | 9.05E-02 | 7.10E-01                             | 8.33E-01 | 7.10E-01                             | 9.05E-02 | 7.10E-01                                | 8.33E-01 | 7.10E-01                             | 8.33E-01 |
| Peer relationships         | 3.60E-01                             | 9.18E-02 | 8.08E-01                          | 8.01E-04 | 1.16E-01                             | 8.75E-01 | 1.16E-01                             | 8.01E-04 | 1.16E-01                                | 8.75E-01 | 1.16E-01                             | 8.75E-01 |
| Shared enjoyment           | 2.20E-01                             | 5.51E-03 | 1.00E+00                          | 5.40E-06 | 2.93E-01                             | 6.96E-02 | 2.93E-01                             | 5.40E-06 | 2.93E-01                                | 6.96E-02 | 2.93E-01                             | 6.96E-02 |
| Socioemotional reciprocity | 1.17E-01                             | 4.00E-04 | 9.87E-01                          | 3.82E-08 | 1.13E-01                             | 3.47E-02 | 1.13E-01                             | 3.82E-08 | 1.13E-01                                | 3.47E-02 | 1.13E-01                             | 3.47E-02 |
| Communication domain       | 7.26E-01                             | 3.21E-02 | 9.38E-01                          | 3.28E-03 | 4.80E-01                             | 4.77E-01 | 4.80E-01                             | 3.28E-03 | 4.80E-01                                | 4.77E-01 | 4.80E-01                             | 4.77E-01 |
| Gestures                   | 3.05E-01                             | 1.52E-01 | 8.68E-01                          | 1.01E-03 | 8.44E-01                             | 5.59E-02 | 8.44E-01                             | 1.01E-03 | 8.44E-01                                | 5.59E-02 | 8.44E-01                             | 5.59E-02 |
| Imagination & Imitation    | 1.00E+00                             | 2.75E-02 | 1.60E-01                          | 1.36E-01 | 2.73E-01                             | 9.92E-01 | 2.73E-01                             | 1.36E-01 | 2.73E-01                                | 9.92E-01 | 2.73E-01                             | 9.92E-01 |
| RRB domain                 | 1.04E-05                             | 1.34E-04 | 1.00E+00                          | 3.60E-10 | 1.77E-04                             | 5.30E-03 | 1.77E-04                             | 3.60E-10 | 1.77E-04                                | 5.30E-03 | 1.77E-04                             | 5.30E-03 |
| Unusual interests          | 7.71E-05                             | 9.53E-01 | 9.16E-01                          | 1.14E-05 | 6.56E-03                             | 9.84E-01 | 6.56E-03                             | 1.14E-05 | 6.56E-03                                | 9.84E-01 | 6.56E-03                             | 9.84E-01 |
| Routines & rituals         | 1.52E-03                             | 9.34E-01 | 3.72E-01                          | 6.54E-04 | 3.01E-01                             | 4.76E-01 | 3.01E-01                             | 6.54E-04 | 3.01E-01                                | 4.76E-01 | 3.01E-01                             | 4.76E-01 |
| Motor mannerisms           | 8.21E-02                             | 3.60E-10 | 8.90E-01                          | 3.60E-10 | 3.34E-02                             | 6.84E-07 | 3.34E-02                             | 3.60E-10 | 3.34E-02                                | 6.84E-07 | 3.34E-02                             | 6.84E-07 |
| Sensorimotor interests     | 9.67E-02                             | 3.60E-10 | 5.78E-02                          | 3.60E-10 | 1.22E-04                             | 4.80E-03 | 1.22E-04                             | 3.60E-10 | 1.22E-04                                | 4.80E-03 | 1.22E-04                             | 4.80E-03 |

**Supplementary Table S8:** Comparison of autism in the genetic variant groups to the heterogeneous autism group in terms of IQ and symptom domains

FSIQ, Full Scale Intelligence Quotient; VIQ, Verbal Intelligence Quotient; PIQ, Performance Intelligence Quotient ; ADI-R, Autism Diagnostic Interview; RRB, Restricted, Repetitive, and Stereotyped Behaviours.

Separate MANCOVA analyses were ran for domain and subdomain scores to avoid including mathematically related scores in the same analysis. Total ADI-R score was analysed separately using an ANCOVA model. Age, gender and site were included as covariates.

| Score                                             | Heterogeneous autism |      | 16p11.2 deletion |    | differ from heterogeneous autism p-value | 16p11.2 duplication |    | differ from heterogeneous autism p-value | 22q11.2 deletion |              | differ from heterogeneous autism p-value | 22q11.2 duplication |      | differ from heterogeneous autism p-value | 5-Group difference MANCOVA |         |                  |
|---------------------------------------------------|----------------------|------|------------------|----|------------------------------------------|---------------------|----|------------------------------------------|------------------|--------------|------------------------------------------|---------------------|------|------------------------------------------|----------------------------|---------|------------------|
|                                                   | N                    | mean | sd               | N  | mean                                     | sd                  | N  | mean                                     | sd               | N            | mean                                     | sd                  | N    | mean                                     | sd                         | p-value |                  |
| <b>Cognitive scores</b>                           |                      |      |                  |    |                                          |                     |    |                                          |                  |              |                                          |                     |      |                                          |                            |         |                  |
| FSIQ                                              | 948                  | 76.0 | 25.3             | 33 | 78.9                                     | 16.0                | 29 | 66.2                                     | 21.8             | 0.153        | 72                                       | 68.9                | 14.1 | 15                                       | 80.5                       | 22.6    | <b>0.013</b>     |
| VIQ                                               | 1135                 | 78.4 | 27.5             | 33 | 75.9                                     | 19.7                | 29 | 68.7                                     | 23.6             | 0.266        | 71                                       | 69.8                | 14.0 | 15                                       | 77.8                       | 17.4    | 0.084            |
| PIQ                                               | 1297                 | 83.5 | 24.9             | 34 | 82.6                                     | 16.1                | 29 | 68.2                                     | 23.0             | <b>0.006</b> | 72                                       | 72.9                | 16.6 | 15                                       | 83.4                       | 20.5    | <b>&lt;0.001</b> |
| <b>ADI-R scores</b>                               |                      |      |                  |    |                                          |                     |    |                                          |                  |              |                                          |                     |      |                                          |                            |         |                  |
| <b>Total score</b>                                | 2027                 | 39.1 | 8.2              | 35 | 31.5                                     | 8.6                 | 29 | 36.7                                     | 9.6              | 0.505        | 85                                       | 31.8                | 7.5  | 20                                       | 35.3                       | 8.6     | <b>&lt;0.001</b> |
| <b>Social domain</b><br><i>subdomains:</i>        | 2027                 | 22.2 | 5.1              | 35 | 18.5                                     | 5.8                 | 29 | 20.7                                     | 5.5              | 0.490        | 85                                       | 18.2                | 4.7  | 20                                       | 21.0                       | 4.9     | <b>&lt;0.001</b> |
| Social interaction                                | 2027                 | 4.2  | 1.6              | 35 | 3.4                                      | 1.7                 | 29 | 3.7                                      | 2.0              | 0.345        | 85                                       | 4.0                 | 1.7  | 20                                       | 4.4                        | 1.3     | 0.635            |
| Peer relationships                                | 2027                 | 6.6  | 1.6              | 35 | 5.6                                      | 1.8                 | 29 | 6.6                                      | 1.2              | 0.999        | 85                                       | 5.8                 | 1.5  | 20                                       | 6.0                        | 1.6     | <b>&lt;0.001</b> |
| Shared enjoyment                                  | 2027                 | 4.8  | 1.5              | 35 | 3.7                                      | 2.0                 | 29 | 4.3                                      | 1.6              | 0.493        | 85                                       | 3.4                 | 1.7  | 20                                       | 4.5                        | 1.6     | <b>&lt;0.001</b> |
| Socioemotional reciprocity                        | 2027                 | 6.7  | 2.1              | 35 | 5.9                                      | 2.1                 | 29 | 6.1                                      | 2.1              | 0.587        | 85                                       | 5.1                 | 1.9  | 20                                       | 6.1                        | 1.8     | <b>&lt;0.001</b> |
| <b>Communication domain</b><br><i>subdomains:</i> | 2027                 | 10.4 | 3.1              | 35 | 7.9                                      | 3.4                 | 29 | 9.3                                      | 3.9              | 0.365        | 85                                       | 8.4                 | 3.0  | 20                                       | 8.7                        | 3.7     | <b>&lt;0.001</b> |
| Gestures                                          | 2027                 | 5.5  | 2.4              | 35 | 3.7                                      | 2.5                 | 29 | 4.4                                      | 2.9              | 0.137        | 85                                       | 3.6                 | 2.6  | 20                                       | 4.5                        | 2.4     | <b>&lt;0.001</b> |
| Imagination & Imitation                           | 2027                 | 4.9  | 1.3              | 35 | 4.2                                      | 1.5                 | 29 | 4.9                                      | 1.5              | 0.999        | 85                                       | 4.8                 | 1.3  | 20                                       | 4.2                        | 1.6     | 0.845            |
| <b>RRB domain</b><br><i>subdomains:</i>           | 2027                 | 6.5  | 2.3              | 35 | 5.1                                      | 1.7                 | 29 | 6.7                                      | 2.3              | 0.992        | 85                                       | 5.2                 | 2.2  | 20                                       | 5.7                        | 1.9     | <b>&lt;0.001</b> |
| Unusual interests                                 | 2027                 | 1.9  | 1.3              | 35 | 1.2                                      | 1.1                 | 29 | 2.0                                      | 1.0              | 0.990        | 85                                       | 1.9                 | 1.1  | 20                                       | 1.7                        | 1.0     | 0.999            |
| Routines & rituals                                | 2027                 | 1.5  | 1.3              | 35 | 1.0                                      | 1.2                 | 29 | 1.6                                      | 1.4              | 0.999        | 85                                       | 1.5                 | 1.3  | 20                                       | 1.4                        | 1.1     | 0.999            |
| Motor mannerisms                                  | 2027                 | 1.5  | 0.7              | 35 | 1.3                                      | 0.9                 | 29 | 1.4                                      | 0.8              | 0.996        | 85                                       | 0.7                 | 0.8  | 20                                       | 1.2                        | 0.9     | <b>&lt;0.001</b> |
| Sensorimotor interests                            | 2027                 | 1.6  | 0.6              | 35 | 1.7                                      | 0.5                 | 29 | 1.7                                      | 0.5              | 0.901        | 85                                       | 1.2                 | 0.8  | 20                                       | 1.4                        | 0.8     | <b>&lt;0.001</b> |

**Supplementary Table S9:** Effect of age in Aim 2 MANCOVA analyses

FSIQ, Full Scale Intelligence Quotient; VIQ, Verbal Intelligence Quotient; PIQ, Performance Intelligence Quotient ; ADI-R, Autism Diagnostic Interview ; RRB, Restricted, Repetitive, and Stereotyped Behaviours.

| Score                       | p-value | Eta-squared | Fixed effect slope coefficient |
|-----------------------------|---------|-------------|--------------------------------|
| <b>Cognitive scores</b>     |         |             |                                |
| FSIQ                        | <0.001  | 1.8         | 0.31                           |
| VIQ                         | <0.001  | 3.6         | 0.88                           |
| PIQ                         | 0.568   | 0.0         | -0.22                          |
| <b>ADI-R scores</b>         |         |             |                                |
| <b>Total score</b>          | <0.001  | 2.1         | 0.24                           |
| <b>Social domain</b>        | <0.001  | 1.9         | 0.14                           |
| <i>subdomains:</i>          |         |             |                                |
| Social interaction          | <0.001  | 5.3         | 0.07                           |
| Peer relationships          | 0.007   | 0.3         | 0.02                           |
| Shared enjoyment            | <0.001  | 1.5         | 0.04                           |
| Socioemotional reciprocity  | 0.114   | 0.1         | 0.01                           |
| <b>Communication domain</b> | <0.001  | 1.0         | 0.06                           |
| <i>subdomains:</i>          |         |             |                                |
| Gestures                    | 0.008   | 0.3         | 0.03                           |
| Imagination & Imitation     | <0.001  | 1.7         | 0.04                           |
| <b>RRB domain</b>           | <0.001  | 0.6         | 0.03                           |
| <i>subdomains:</i>          |         |             |                                |
| Unusual interests           | <0.001  | 1.7         | 0.03                           |
| Routines & rituals          | <0.001  | 1.0         | 0.03                           |
| Motor mannerisms            | <0.001  | 0.8         | -0.01                          |
| Sensorimotor interests      | <0.001  | 0.6         | -0.01                          |

**Supplementary Figure S1:** Proportion of CNV carriers who met clinical cut-offs for the three autism domains

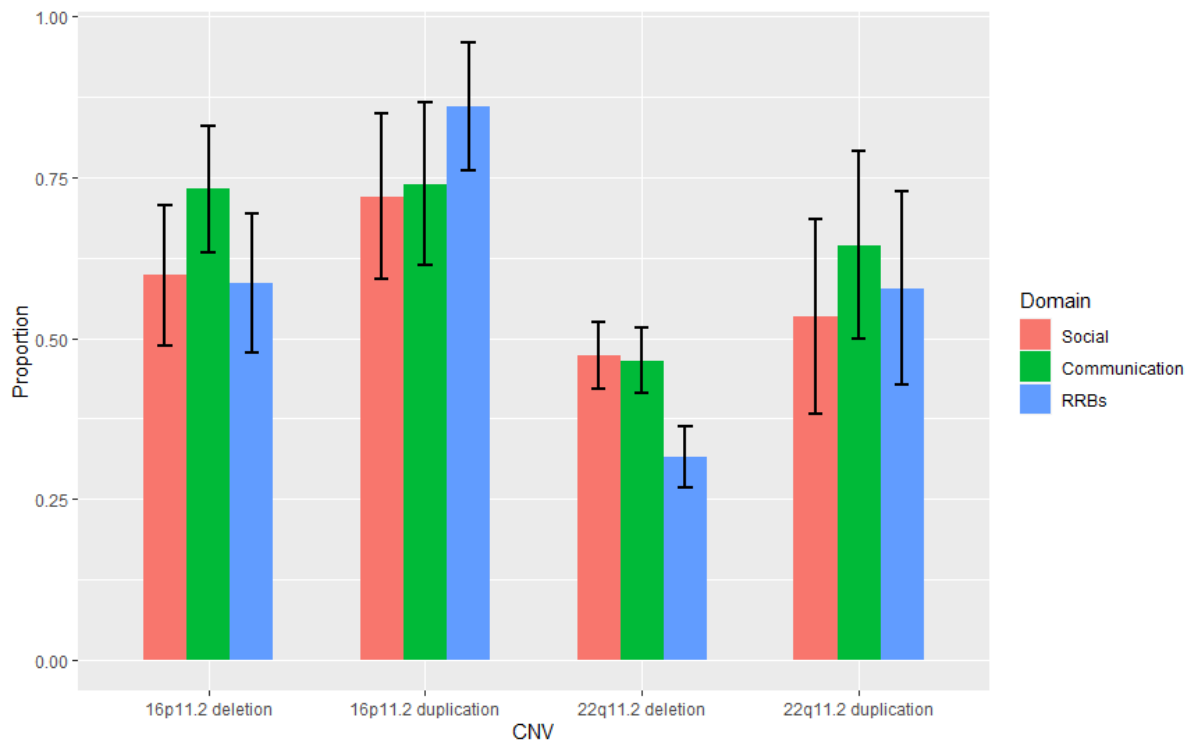

Error bars indicate 95% confidence intervals. RRB: Restricted, Repetitive, and Stereotyped Behaviours.

**Supplementary Figure S2:** Distribution of total ADI-R score, autism domain scores, and FSIQ by genetic variant group

The range of scores for total ADI-R scores is highly overlapping between groups (16p11.2 deletion, 3 to 48; 16p11.2 duplication, 0 to 53; 22q11.2 deletion, 0 to 48; 22q11.2 duplication, 0 to 48).

Similarly, the IQ ranges overlap (16p11.2 deletion, 42 - 122; 16p11.2 duplication, 28 - 108; 22q11.2 deletion, 42 - 117; 22q11.2 duplication, 30 - 119).

The 4 vertical lines indicate group means.

ADI-R, Autism Diagnostic Interview ; RRB, Restricted, Repetitive, and Stereotyped Behaviours.

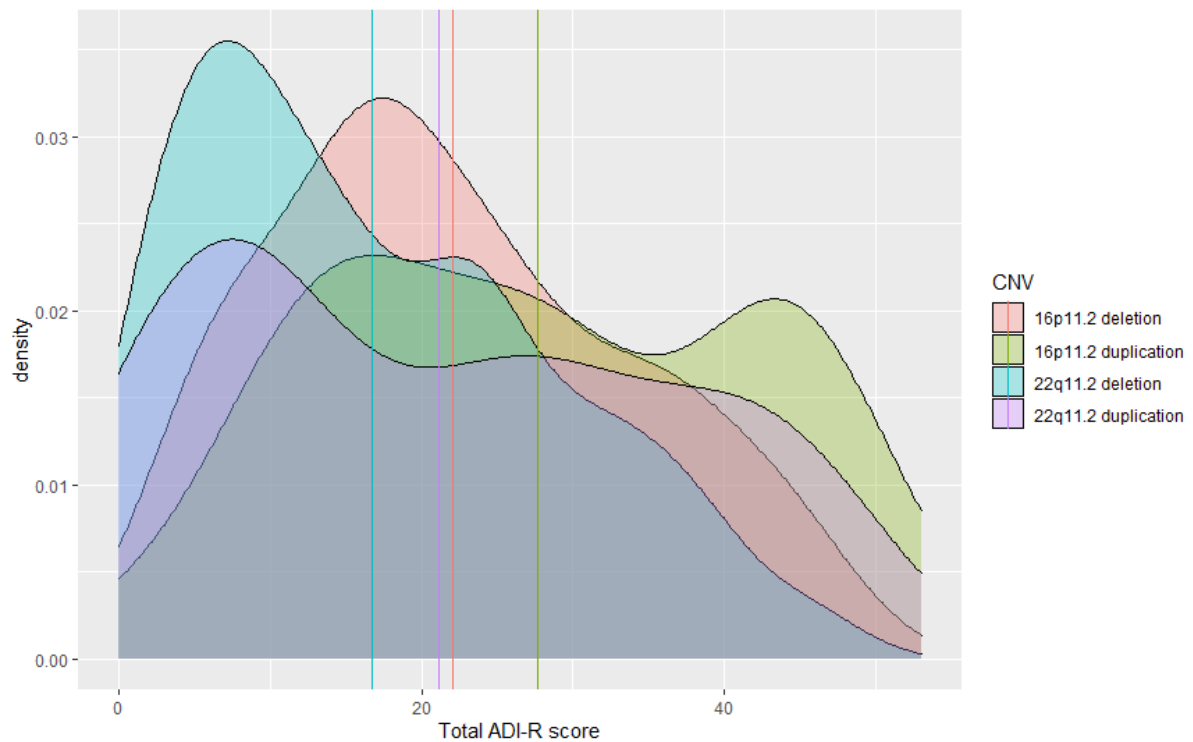



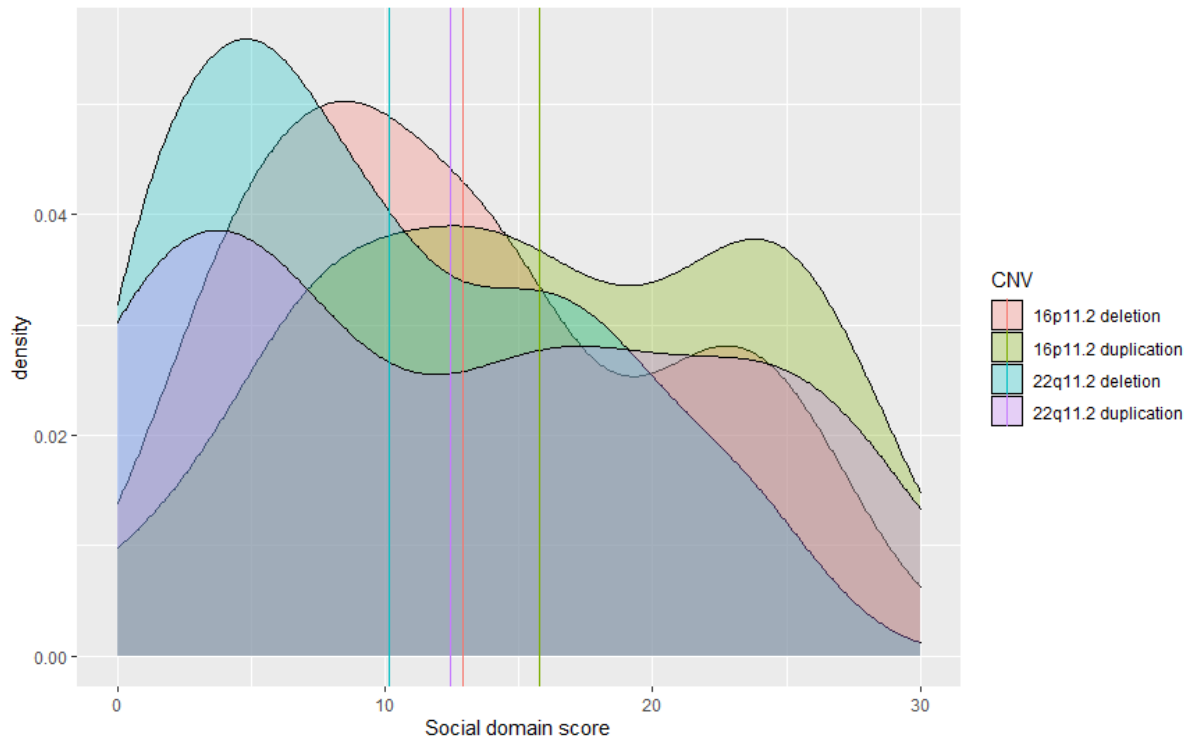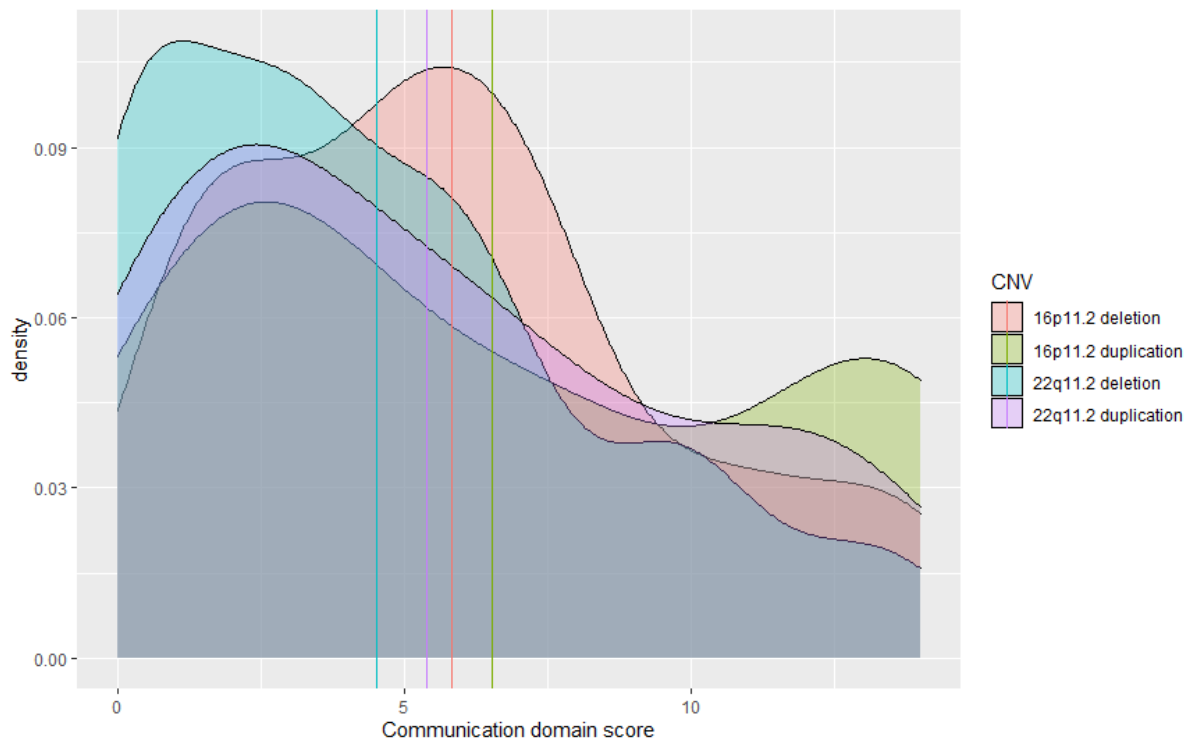

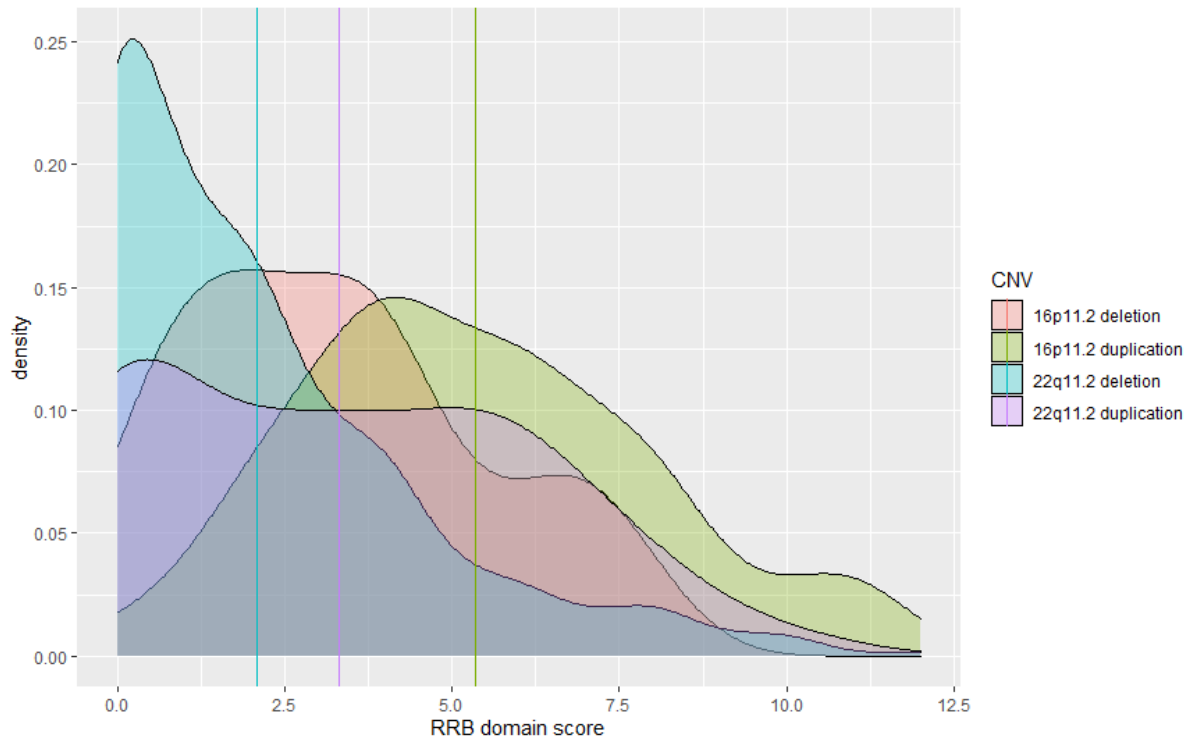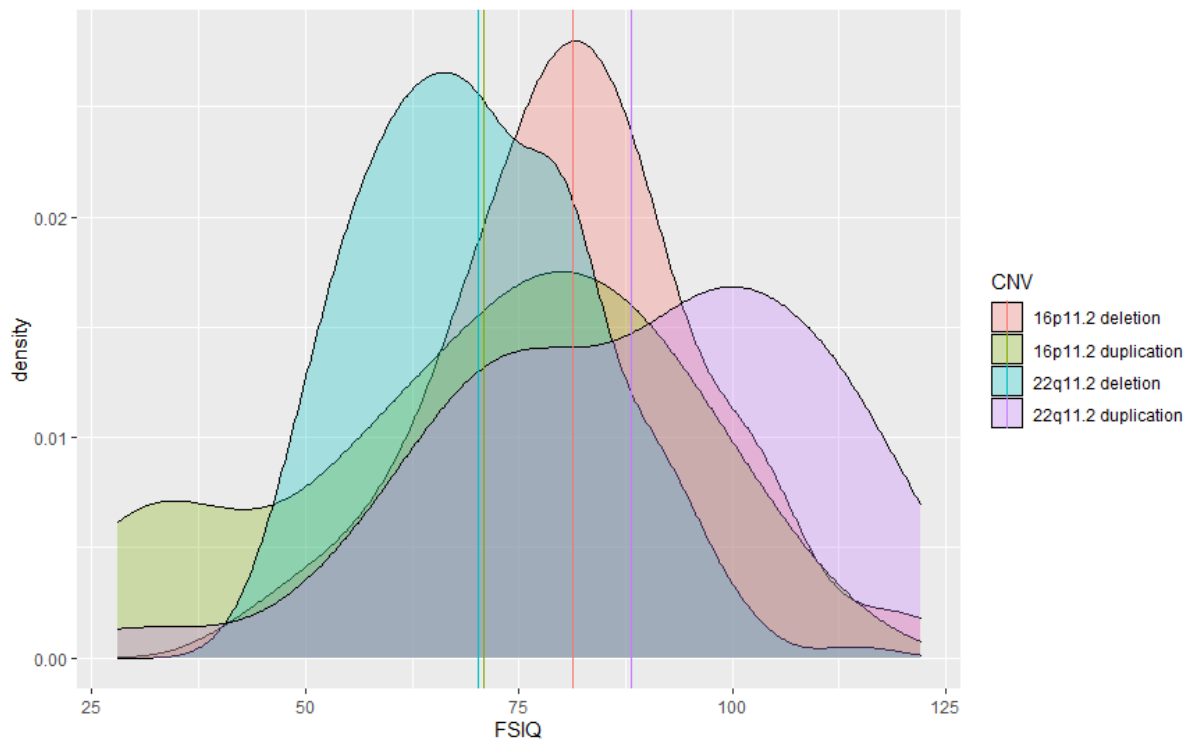

**Supplementary Figure S3:** Hypothetical plots of “non-specific”, “partially specific” and “highly specific” models of genotype-phenotype relationships within autism

We conceptualise three possible models (Figure 1); the “nonspecific effect” model whereby all genotypes lead to similar autism phenotypes; the “highly specific” model whereby each genotype leads to a unique autism phenotype; and the “partially specific model” whereby autism profiles are distinct but overlapping.

Non-specific model: for Trait A, genotype does not explain any of the variance in phenotype, indicating that phenotypic variability is explained by within group factors. Highly specific model: for Trait C genotype explains all the variability in phenotypic outcome, indicating that there is no within group variability. Partially specific model: where both between genotype and within genotype variability exist.

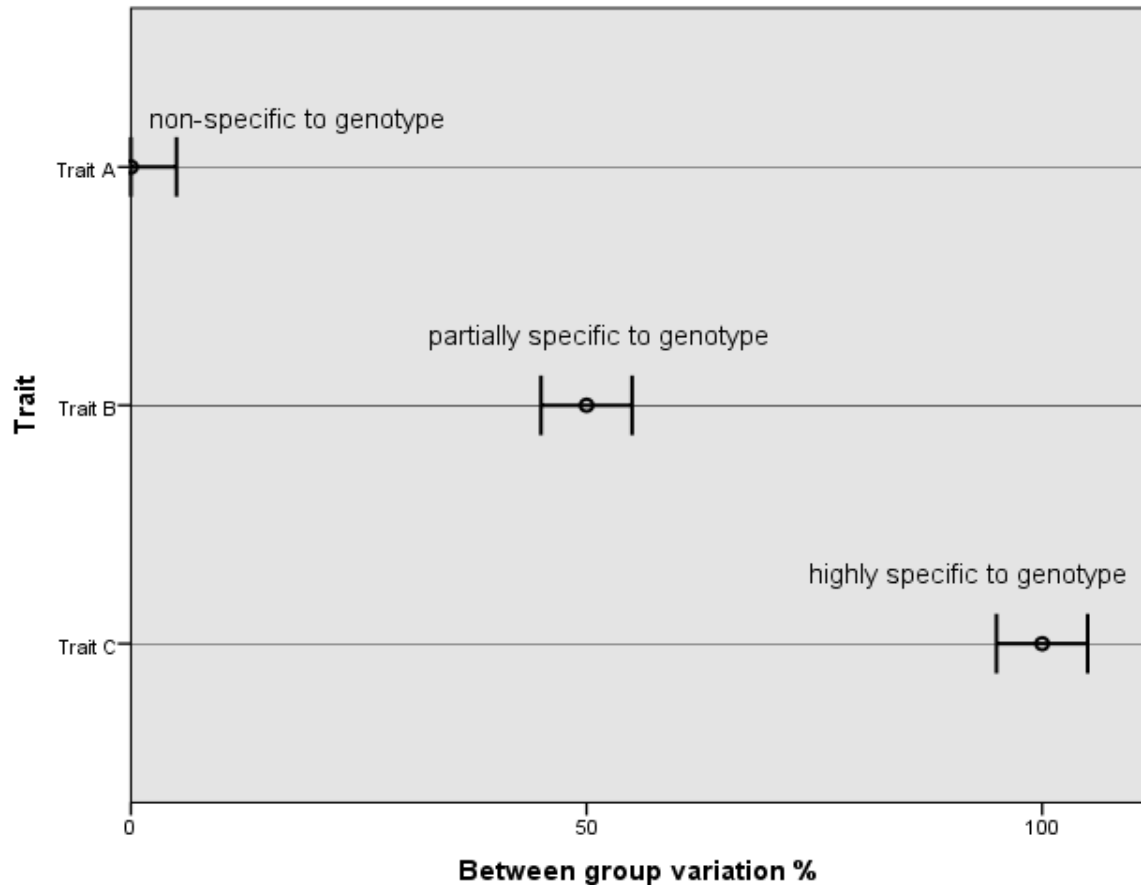

### Supplementary Materials References

- 1 Merikangas, A. *et al.* The phenotypic manifestations of rare genic CNVs in autism spectrum disorder. *Molecular psychiatry* **20**, 1366 (2015).
- 2 Kates, W. R. *et al.* Comparing phenotypes in patients with idiopathic autism to patients with velocardiofacial syndrome (22q11 DS) with and without autism. *American Journal of Medical Genetics Part A* **143**, 2642-2650 (2007).
- 3 Liu, X.-Q. *et al.* Identification of genetic loci underlying the phenotypic constructs of autism spectrum disorders. *Journal of the American Academy of Child & Adolescent Psychiatry* **50**, 687-696. e613 (2011).
